# Supplementary material for: Genetic deficiency or pharmacological inhibition of miR-33 protects from kidney fibrosis
Source: JCI journal article supplement (doi:10.1172/jci.insight.131102), 2019-10-15
Supplement: sd1 [file 1]

# Genetic deficiency or pharmacological inhibition of miR-33 protects from kidney fibrosis

Nathan L. Price<sup>1,2,\*</sup>, Verónica Miguel<sup>3,\*</sup>, Wen Ding<sup>1,2</sup>, Abhishek K. Singh<sup>1,2</sup>, Shipra Malik<sup>4</sup>, Noemi Rotllan<sup>1,2</sup>, Anna Moshnikova<sup>5</sup>, Jakub Toczek<sup>1,6,7</sup>, Caroline Zeiss<sup>2</sup>, Mehran M. Sadeghi<sup>1,6,7</sup>, Noemi Arias<sup>8</sup>, Ángel Baldán<sup>8</sup>, Oleg A. Andreev<sup>5</sup>, Diego Rodríguez-Puyol<sup>9</sup>, Raman Bahal<sup>4</sup>, Yana K Reshetnyak<sup>5</sup>, Yajaira Suárez<sup>1,2</sup>, Carlos Fernández-Hernando<sup>1,2,#</sup> and Santiago Lamas<sup>3,#</sup>

<sup>1</sup> Vascular Biology and Therapeutics Program, Yale University School of Medicine, New Haven, Connecticut, USA.

<sup>2</sup> Integrative Cell Signaling and Neurobiology of Metabolism Program, Department of Comparative Medicine and Department of Pathology, Yale University School of Medicine, New Haven, Connecticut, USA.

<sup>3</sup> Department of Cell Biology and Immunology, Centro de Biología Molecular “Severo Ochoa” (CSIC-UAM), Madrid, Spain.

<sup>4</sup> Department of Pharmaceutical Sciences, University of Connecticut, Storrs, Connecticut, USA.

<sup>5</sup> Department Physics, University of Rhode Island, Kingston, Rhode Island, USA.

<sup>6</sup> Cardiovascular Molecular Imaging Laboratory, Section of Cardiovascular Medicine and Yale Cardiovascular Research Center, Yale University School of Medicine, New Haven, Connecticut, USA.

<sup>7</sup> Section of Cardiology, Veterans Affairs Connecticut Healthcare System, West Haven, CT, USA

<sup>8</sup>Edward A. Doisy Department of Biochemistry and Molecular Biology and Center for Cardiovascular Research, Saint Louis University School of Medicine, St. Louis, USA.

<sup>9</sup> Department of Medicine and Medical Specialties, Research Foundation of the University Hospital “Príncipe de Asturias”, IRYCIS, Alcalá University, Alcalá de Henares, Madrid, Spain

**Running Title:** miR-33 in renal fibrosis.

## SUPPLEMENTAL INFORMATION

### SUPPLEMENTAL FIGURE LEGENDS

**Supplemental Figure 1. Renal SREBP2/miR-33 expression is not altered in folic acid and UUO-induce kidney fibrosis.**

**(A-D)** *miR-33* (**A** and **C**) and *Srebp2* (**B** and **D**) expression in non-treated (NT) or folic acid (FA) treated mice (**A** and **B**) or in mice that underwent UUO surgery (**C** and **D**) (n=6). Statistical significance was

determined using unpaired two-sided Student's t-test. Data represent the mean  $\pm$  S.E.M. of relative expression levels normalized to NT mice or CT kidney.

**Supplemental Figure 2. miR-33 is expressed in the kidney and renal TECs.** (A) miR-33 expression in several human tissues. Data obtained from the human miRNA tissue atlas project (<https://ccb-web.cs.uni-saarland.de/tissueatlas/>). Red arrow indicates miR-33 expression in the kidney. (B) Functional annotation of mammalian genome (FANTOM5) analysis of miR-33 expression analysis in 400 human primary cells (fantom.grs.riken.jp). Red squares highlight the expression of miR-33 in renal TECs. (C) qRT-PCR analysis of miR-33 expression in mouse primary renal TECs. CT value for the analysis is indicated in red. Statistical significance was determined using unpaired two-sided Student's t-test.

**Supplemental Figure 3. miR-33 expression is not affected by TGFB treatment in renal TEC.**

qRT-PCR analysis of miR-33 expression in the HKC-8 human renal TEC line treated with TGF $\beta$  for 24 and 48 h. Statistical significance was determined using non-parametric two-tailed Mann-Whitney U test.

**Supplemental Figure 4. Gating strategy used for the analysis of pHLIP association to renal TECs.**

Representative dot plot FACS analysis of pHLIP associated to TECs treated with saline (left panel), pHLIP-A546-5K (middle panel) and pHLIP-A546 (right panel). LTL (lotus tetragonolobus lectin)-FITC labelling was used for the identification of renal TECs.

**Supplemental Figure 5. miR-33 silencing does not influence renal AMPK and PGC1 $\alpha$  expression.**

Representative WB analysis of PGC1 $\alpha$ , AMPK, p-AMPK and vinculin in kidneys of mice injected with Src<sup>pHLIP</sup> or anti-miR-33<sup>pHLIP</sup> treated or not with folic acid.

Supplemental Figure 1

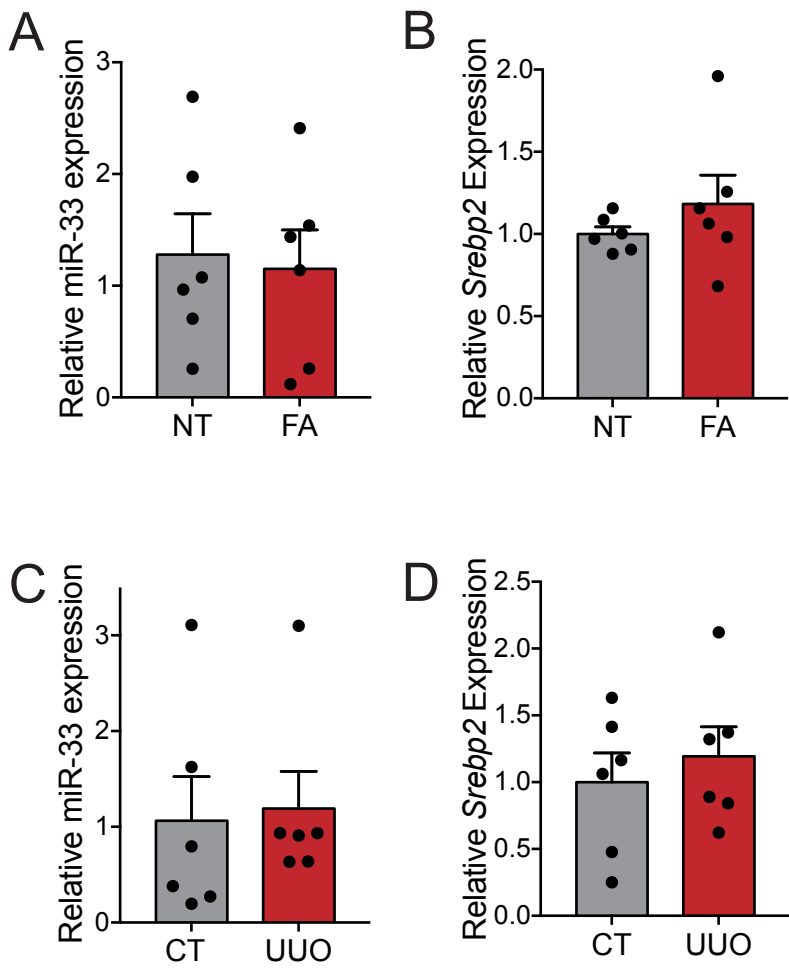

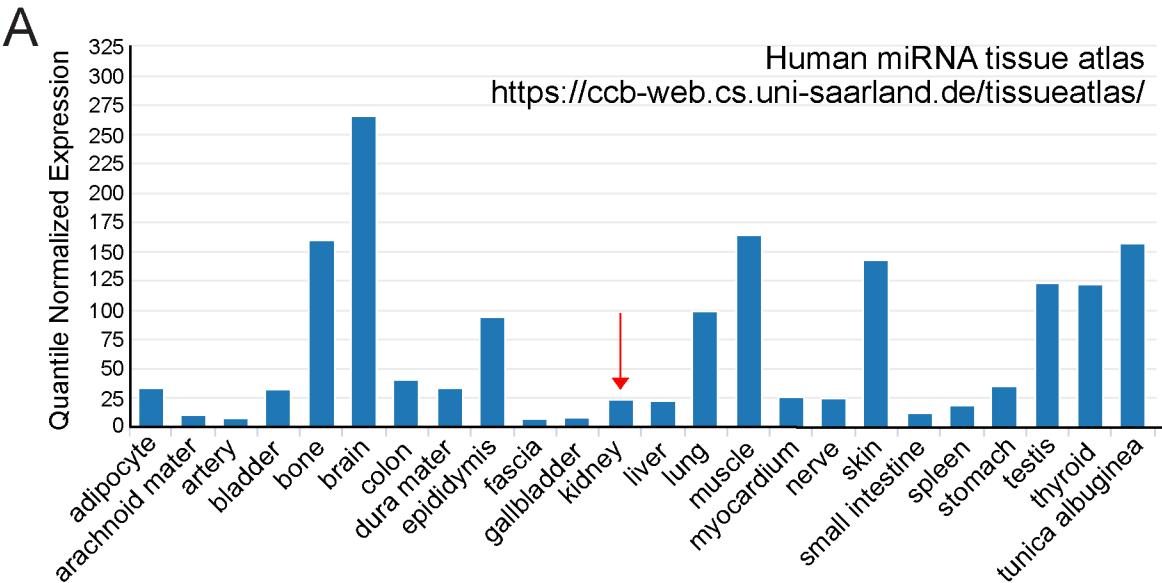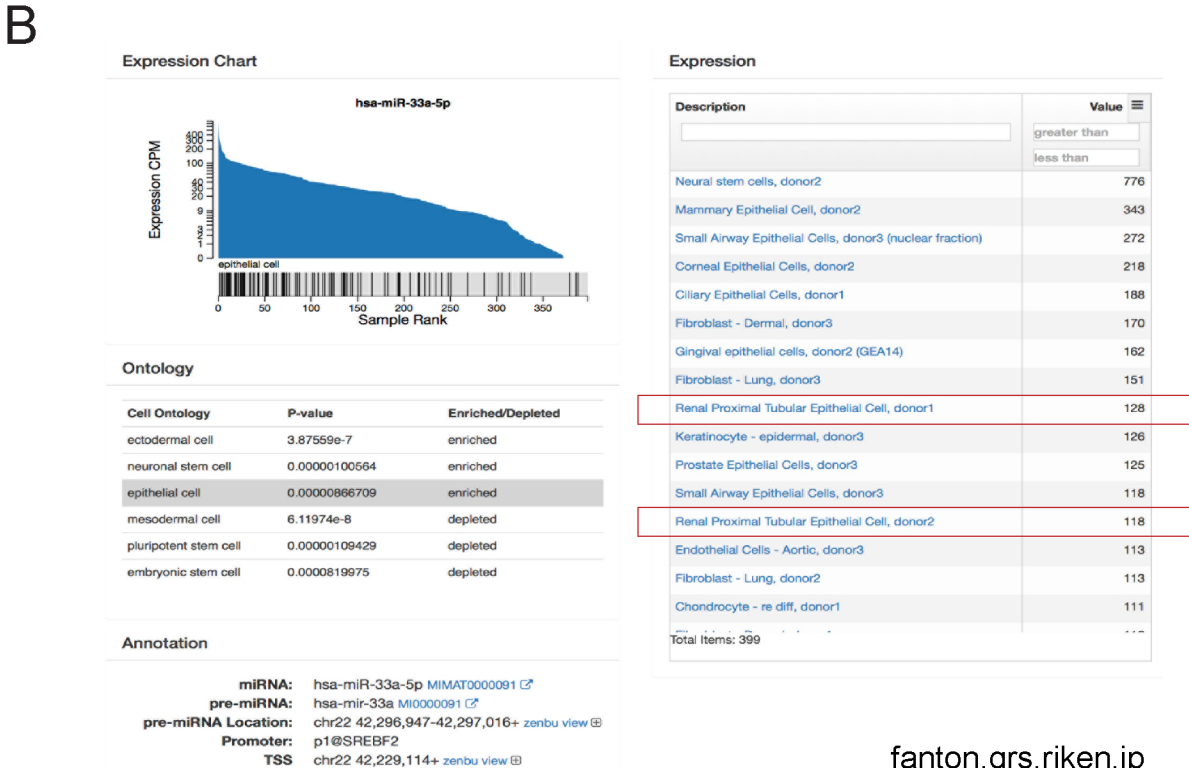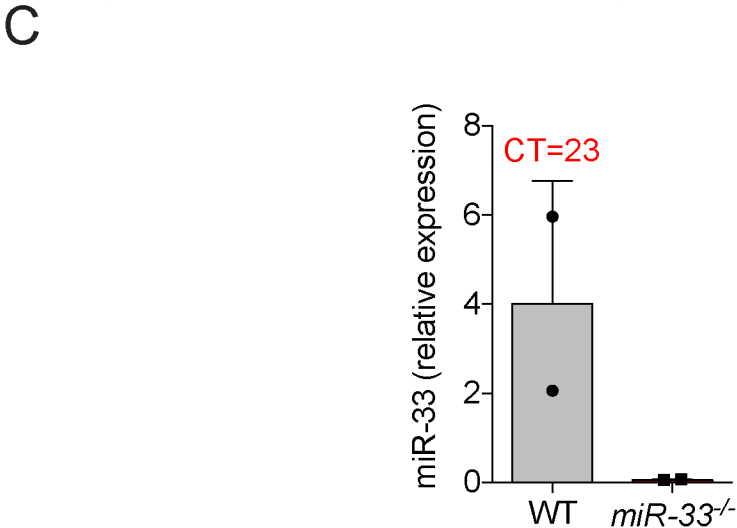

## Supplemental Figure 3

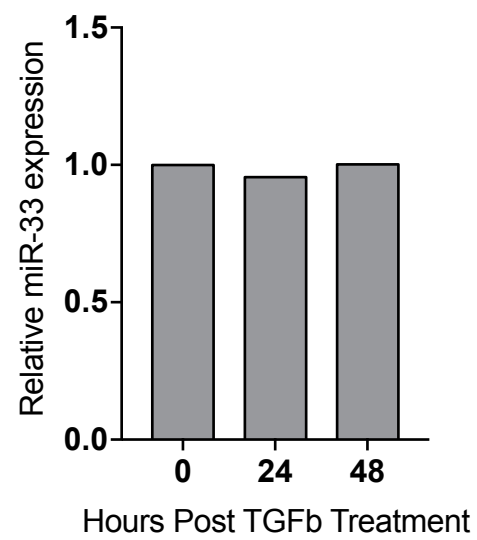

## Supplemental Figure 4

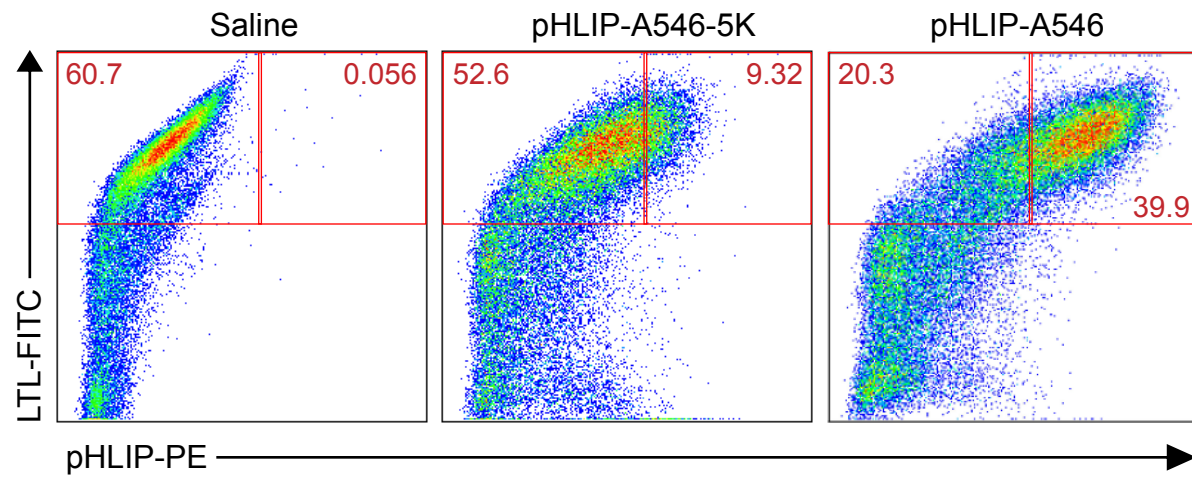

Supplemental Figure 5

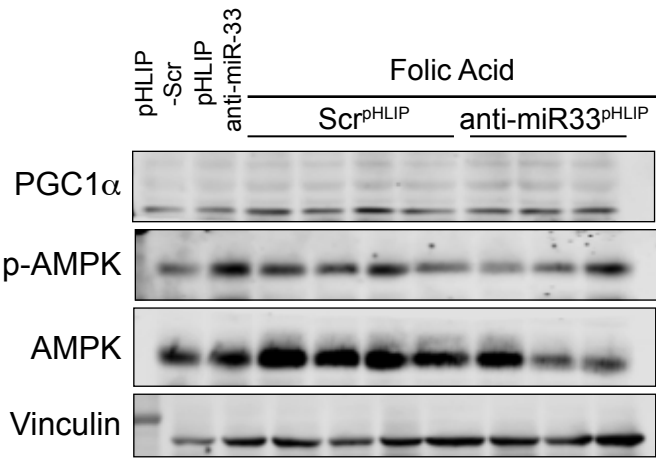

|                           |                              |
|---------------------------|------------------------------|
| <b>Genotyping Primers</b> |                              |
| miR-33 Knockout           | FW: AGCCTGCTGGGCTCTCTGAGAC   |
|                           | RE: AGCCGCTACCATGACATTCCAG   |
|                           |                              |
| <b>qPCR Primers</b>       |                              |
| $\alpha$ SMA              | FW: CTGACAGAGGCACCACTGAA     |
|                           | RE: CATCTCCAGAGTCCAGCACA     |
| FN1                       | FW: ACCGACAGTGGTGTGGTCTA     |
|                           | RE: CACCATAAGTCTGGGTCACG     |
| COL1A1                    | FW: CTGCTGGCAAAGATGGAGA      |
|                           | RE: ACCAGGAAGACCCTGGAATC     |
| CPT1A                     | FW: TTGATCAAGAAGTGCCGACGAGT  |
|                           | RE: GTCCATCATGGCCAGCACAAAGTT |
| CROT                      | FW: ACTGAGAGTGAAGGGCATTGTCCA |
|                           | RE: AATGCCGCTATACTGGGTCCAACA |
| HADH $\beta$              | FW: CACTTTCGGGTTTGTTCATCGGA  |
|                           | RE: GCTGTGGTCATGGCTTGGTTTGAA |
| IL-6                      | FW: AGTTGCCTTCTTGGGACTGA     |
|                           | RE: TCCACGATTTCCCAGAGAAC     |
| IL-1 $\beta$              | FW: CCAAATACCTGTGGCCTTGG     |
|                           | RE: GCTTGTGCTCTGCTTGTGAG     |
| 18s                       | FW: TTCCGATAACGAACGAGACTCT   |
|                           | RE: TGGCTGAACGCCACTTGTC      |
| CD68                      | FW: CCAATTCAGGGTGGAAGAAA     |
|                           | RE: CTCGGGCTCTGATGTAGGTC     |
| TNF $\alpha$              | FW: CCCTCACACTCAGATCATCTTCT  |
|                           | RE: GCTACGACGTGGCTACAG       |

**Supplementary Table 1**
